# Supplementary material for: Vnn1 pantetheinase limits the Warburg effect and sarcoma growth by rescuing mitochondrial activity
Source: Life Sci Alliance. 2018 Jul 23;1(4):e201800073. doi: 10.26508/lsa.201800073 (PMC6238586; doi:10.26508/lsa.201800073)
Supplement: Supplementary file 3 [file LSA-2018-00073_TableS3.xlsx]

## Sheet: Feuil1
Name	f.value	p.value	-log10(p)	FDR	Post-hoc tests
energy_metabolism	444.2	9.5859E-15	14.018	2.7799E-13	vr-ras; vr-Rcea
ketogenesis	140.7	6.9836E-11	10.156	1.0126E-9	vr-ras; vr-Rcea
aminoacids	64.90	2.1026E-8	7.6772	2.0325E-7	vr-ras; vr-Rcea
purines_metabolism	38.55	7.6083E-7	6.1187	5.516E-6	Rcea-ras; vr-ras; vr-Rcea
phospholip_metabolism	33.12	2.0516E-6	5.6879	1.1899E-5	vr-ras; vr-Rcea
lipid_metabolism	22.03	2.5336E-5	4.5963	1.2246E-4	vr-ras; vr-Rcea
glycolysis	19.17	5.6362E-5	4.249	2.335E-4	vr-ras; vr-Rcea
pyrimidine_metabolism	18.50	6.8905E-5	4.1617	2.4978E-4	vr-ras; vr-Rcea
purinergic_receptors	15.45	1.8315E-4	3.7372	5.9014E-4	vr-ras; vr-Rcea
fatty_acid_oxidation	14.56	2.4948E-4	3.603	7.2349E-4	vr-ras; vr-Rcea
inflammation	13.71	3.3952E-4	3.4691	8.9509E-4	vr-ras; vr-Rcea
NO	12.88	4.638E-4	3.3337	0.0011209	vr-ras; vr-Rcea
biomarkers	12.46	5.4486E-4	3.2637	0.0012155	vr-ras; vr-Rcea
biopterins	11.49	8.0433E-4	3.0946	0.0016661	vr-ras; vr-Rcea
Trp_metabolism	10.52	0.0012111	2.9168	0.0023415	vr-ras; vr-Rcea
inflammatory_lipids	8.905	0.0025151	2.5994	0.0045587	vr-ras; vr-Rcea
miscelleneaous	8.721	0.0027443	2.5616	0.0046815	vr-ras; vr-Rcea
parylation	8.257	0.0034382	2.4637	0.0055394	vr-ras; vr-Rcea
cell_growth	6.887	0.0069527	2.1578	0.010612	vr-ras; vr-Rcea
TCA	6.473	0.0087114	2.0599	0.012631	vr-ras
CHO_metabolism	6.193	0.010187	1.992	0.014068	vr-ras
redox	6.045	0.011076	1.9556	0.014601	vr-ras; vr-Rcea
steroid_metabolism	5.948	0.01171	1.9314	0.014765	vr-ras
bile_acids	5.874	0.012221	1.9129	0.014767	vr-ras; vr-Rcea
